# Supplementary figures and images for: Characterization of submicron aerosols at a rural site in Pearl River Delta of China using an Aerodyne High-Resolution Aerosol Mass Spectrometer
Source: Copernicus journal article supplement (doi:10.5194/acp-11-1865-2011), 2011-03-01

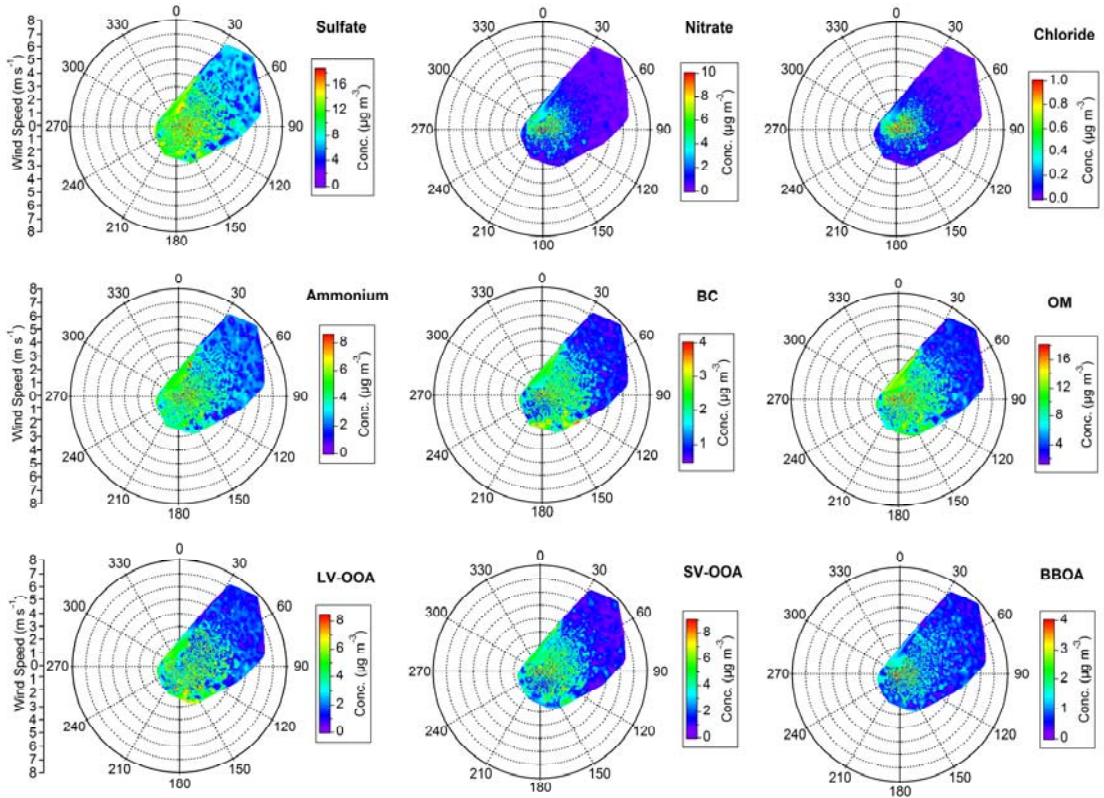

Supplement: Supplementary file 1 [file acp-11-1865-2011-supplement.pdf]
